# Supplementary material
Source: PubMed Central journal article supplement (PMC6418461)
Supplement: EMBJ-38-e99595-s001.pdf [file EMBJ-38-e99595-s001.pdf]

## Expanded View Figures

**Figure EV1. LIF exhibits therapeutic effects in the wild-type mouse colitis model and shows minor effect on Th1-, Th2-, or Treg-cell differentiation.**

- A, B Quantitative expression of *Lifr* and *gp130* mRNA in colon tissue from DSS-challenged or control mice ( $n = 6$  per group) (A) or in IECs following stimulation by LPS (2.5  $\mu\text{g/ml}$ ), PGN (3  $\mu\text{g/ml}$ ), or LTA (2  $\mu\text{g/ml}$ ) for 2 h (B).
- C Macroscopic changes in the colon of WT and *Stat4*-KO mice on day 14 of colitis induction.
- D FACS staining of LPLs isolated on day 10 from the colon of WT and *Stat4*-KO colitis mice receiving PBS or LIF ( $n = 4$  per group). The percentage of IL-17A<sup>+</sup> (left) and IFN $\gamma$ <sup>+</sup>CD4<sup>+</sup> (right) T cells *in vivo* was analyzed.
- E FACS staining of WT and *Stat4*-KO naïve CD4<sup>+</sup> T cells treated or not treated with LIF on day 4 of induction into Th1-, Th2-, or Treg-cell subsets.
- F, G qPCR analysis of Th1, Th2, or Treg signature gene expression in WT and *Stat4*-KO naïve CD4<sup>+</sup> T cells on day 4 of induction into the indicated subsets in the absence or presence of LIF. The data are representative of three independent experiments.

Data information: \* $P < 0.05$ , \*\* $P < 0.01$ , and \*\*\* $P < 0.001$ , ns: not significant (Student's *t*-test). Error bars represent the SEM.

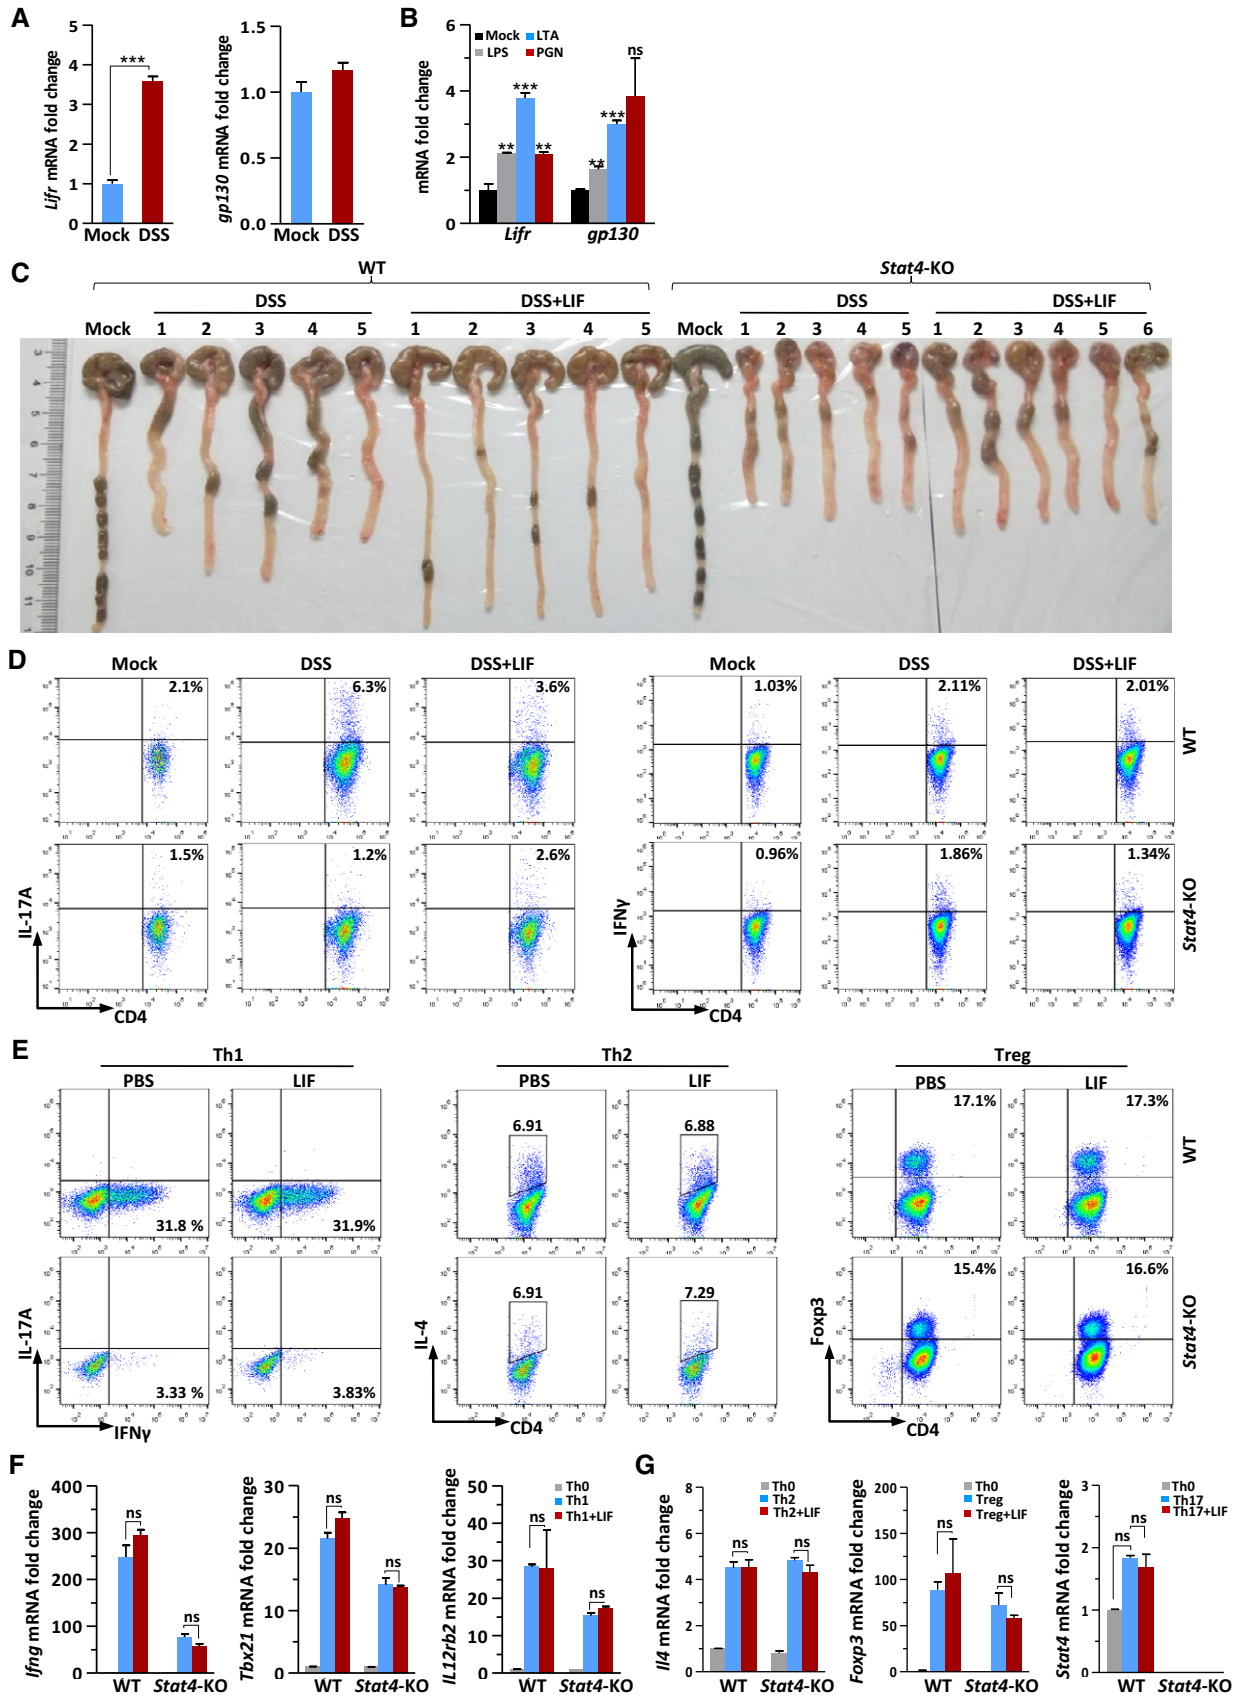

Figure EV1.

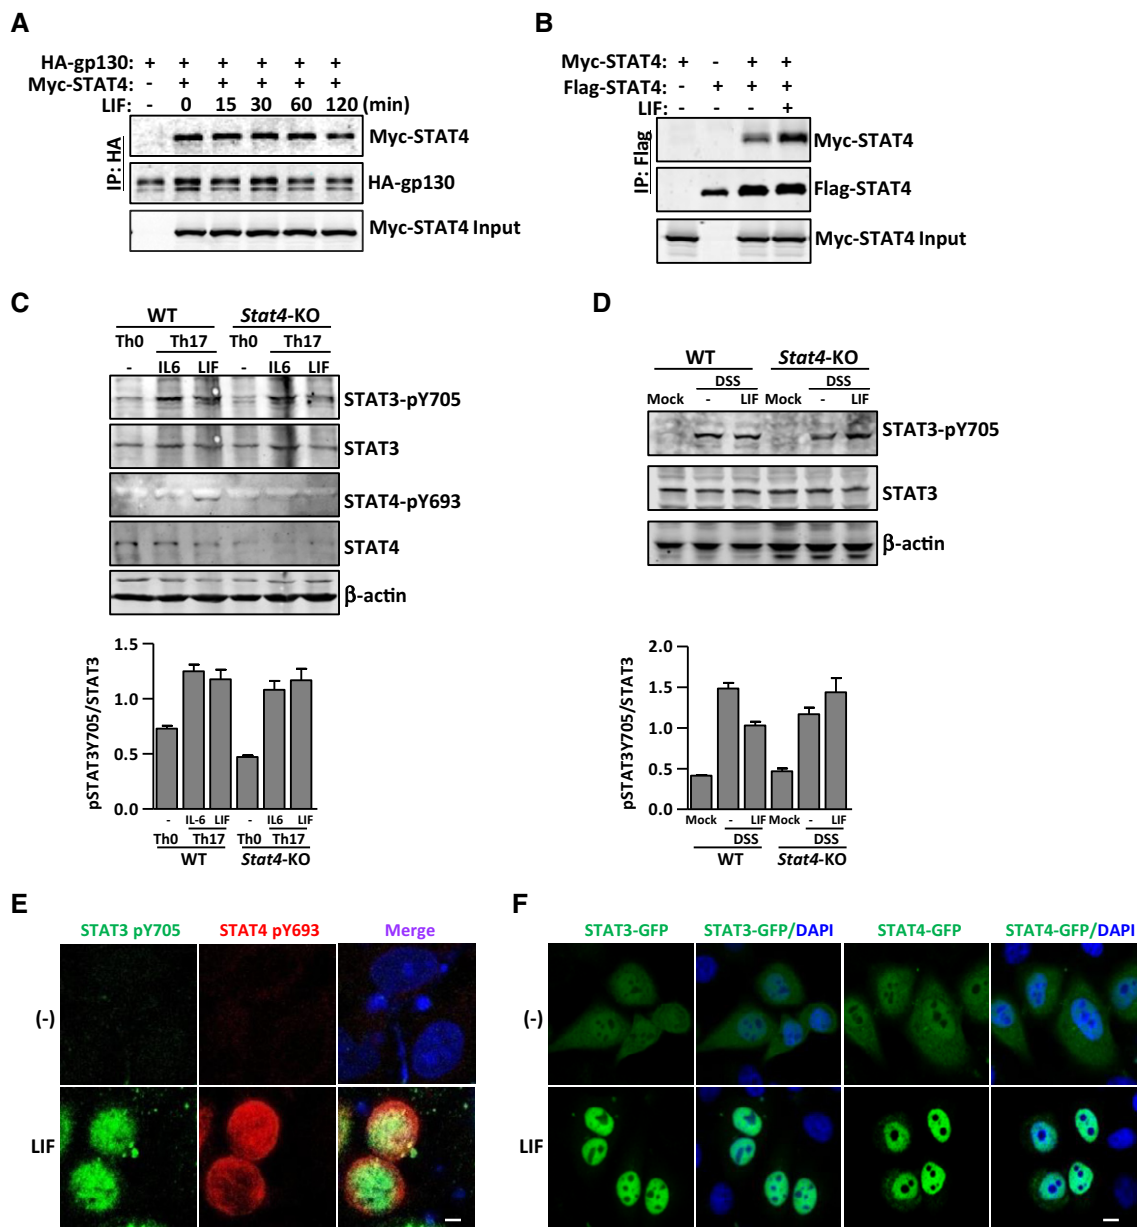

**Figure EV2. STAT4 does not alter LIF-induced STAT3 activation.**

A, B Coimmunoprecipitation and immunoblot analysis of LIF-treated HEK293T cells cotransfected with the indicated constructs.

C, D Immunoblot analysis of the expression and modification of the indicated proteins in WT or *Stat4*-KO naïve CD4<sup>+</sup> T cells on day 4 of induction into Th0 or Th17 cells in the presence or absence of LIF (50 ng/ml) (C) or in spleen extracts from WT or *Stat4*-KO colitis mice treated with or without LIF (50 ng/ml) (D). The bottom panel shows the intensity analysis of the bands from three independent experiments. The data are representative of two independent experiments. Error bars represent the SEM.

E Immunostaining of cultured HeLa cells transfected with STAT4 and STAT3 after LIF treatment with STAT4 and STAT3 phosphorylation antibody. Scale bar, 20 μm.

F Cultured HeLa cells transfected with GFP-tagged STAT4 and RFP-tagged STAT3 were exposed to LIF and imaged 30 min later. Scale bar, 50 μm.

Source data are available online for this figure.

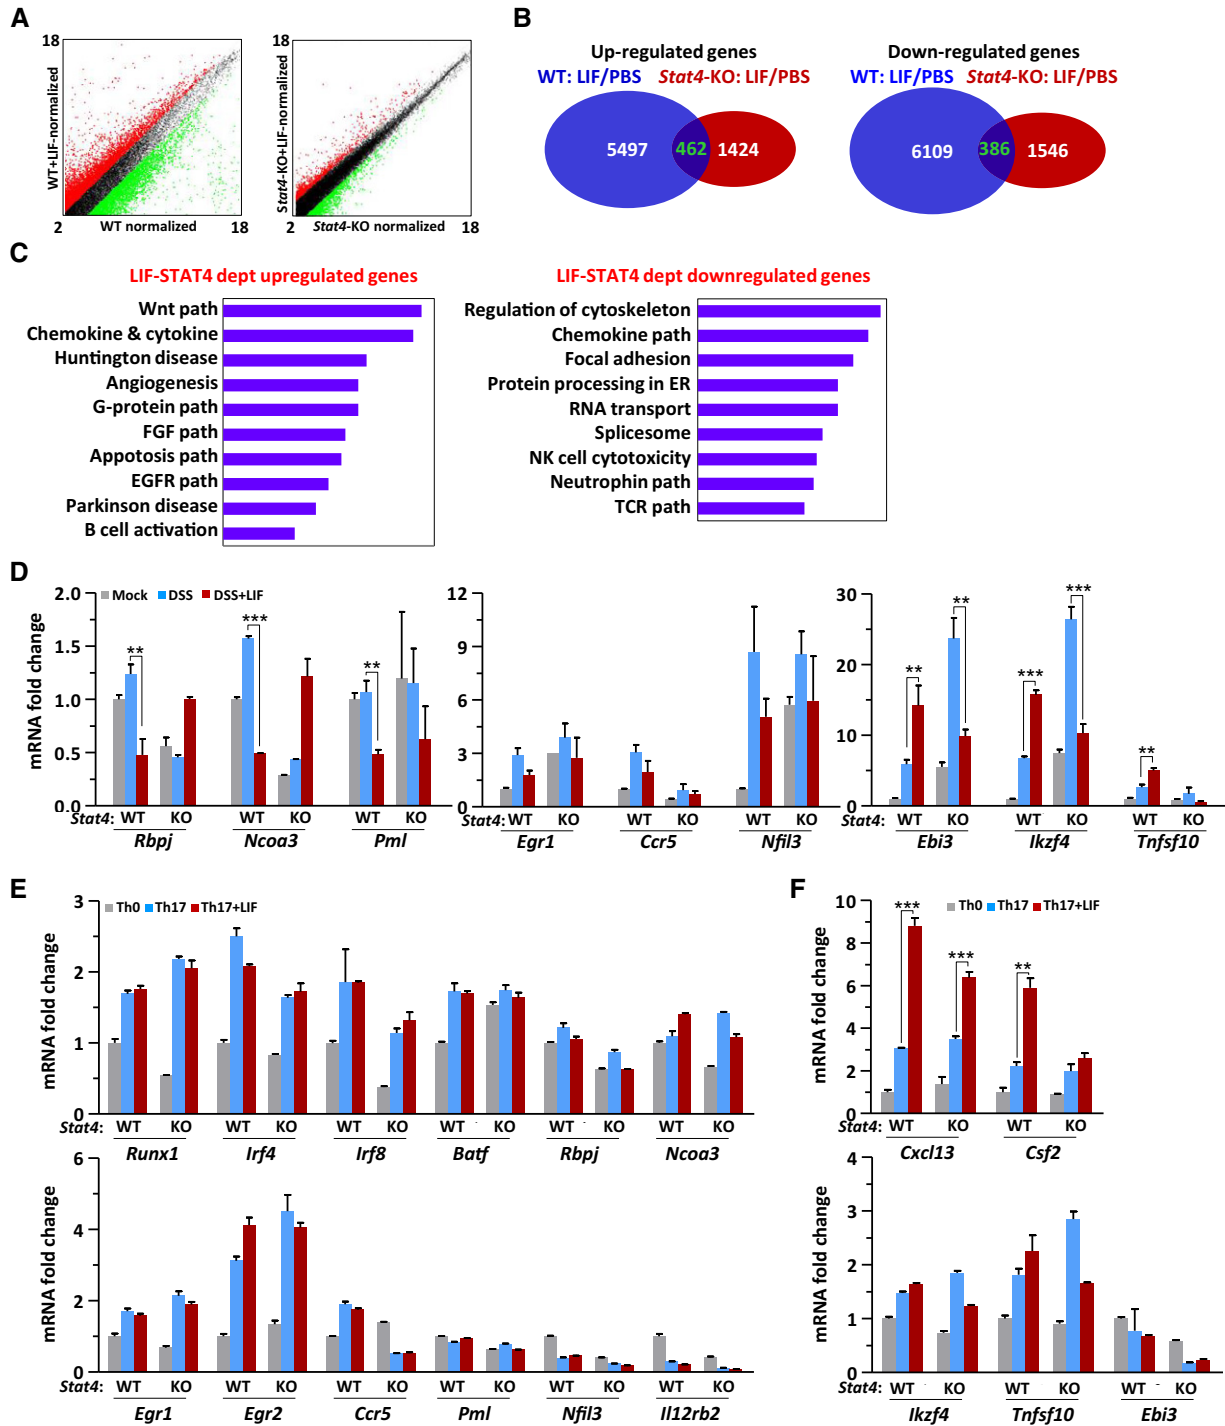

**Figure EV3. LIF shows minimal effect on Th17 regulatory genes expression *in vitro*.**

A, B Gene chip analysis of LPLs purified from colitis mice treated as described in Fig 2A. A scatter plot (A) and the statistical analysis (B) of the average fragments per kilobase of transcript per million mapped reads in WT and *Stat4*-KO mice receiving PBS or LIF.

C Functional pathway analysis of LPLs isolated on day 10 from the colon of WT or *Stat4*-KO colitis mice receiving injections of PBS or LIF ( $n = 4$  per group).

D–F qPCR analysis of the indicated genes in LPLs from colitis mice treated as described in Fig EV3A (D) or in WT or *Stat4*-KO naive CD4<sup>+</sup> T cells on day 4 of induction into Th17 subsets in the absence or presence of LIF (E, F). The data are representative of two experiments. \*\* $P < 0.01$  and \*\*\* $P < 0.001$  (Student's *t*-test). Error bars represent the SEM.

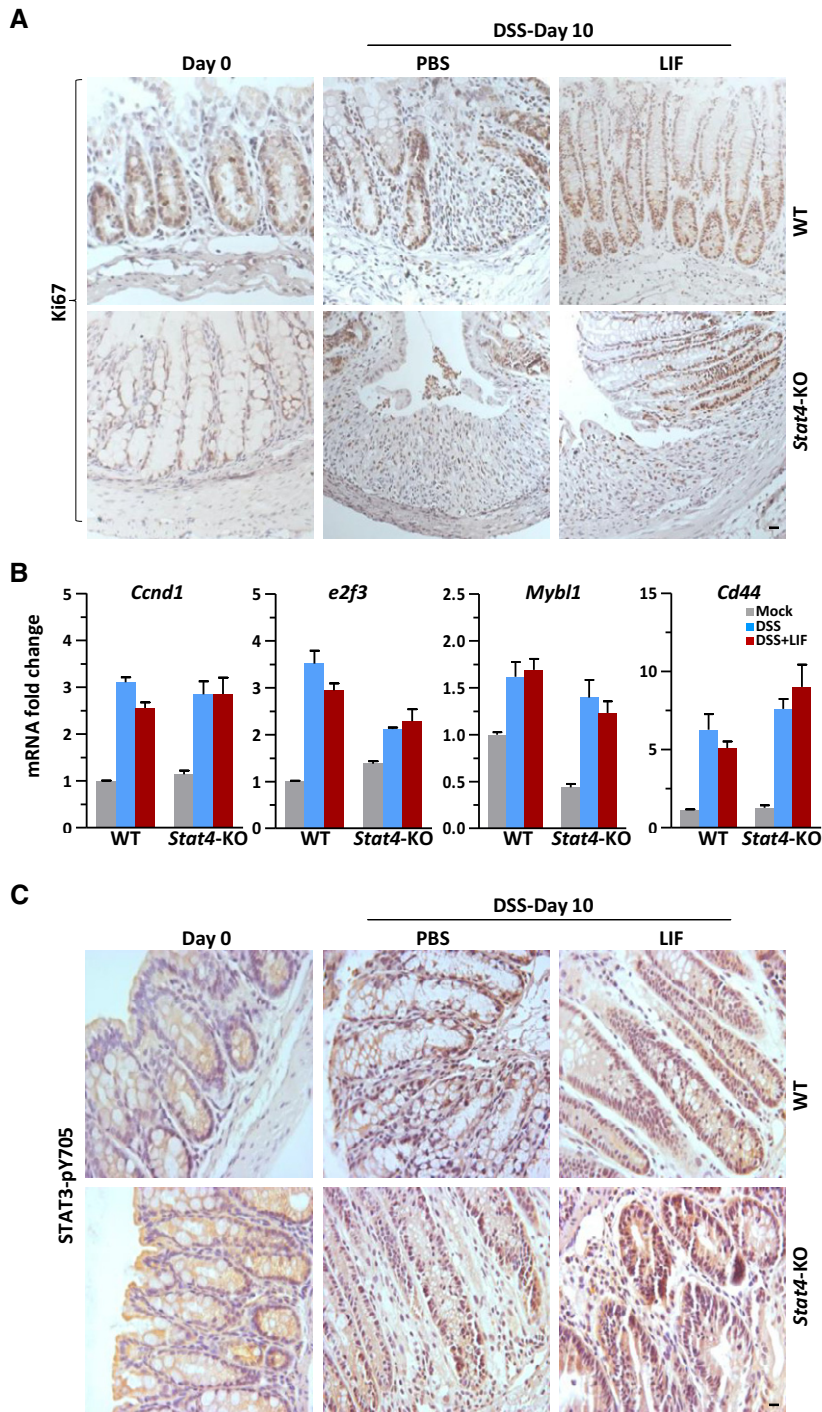

**Figure EV4. STAT4 does not regulate the expression of proliferation-related genes in IECs.**

A Ki67 staining of representative colons on day 10 of colitis induction as described in Fig 2A. Scale bar, 20  $\mu$ m.

B Quantitative mRNA expression analysis of the indicated genes in colon tissue from WT or *Stat4*-KO colitis mice treated as described in Fig 2A ( $n = 3$  per group). Error bars represent the SEM.

C Colons obtained from WT or *Stat4*-KO mice on day 10 of the colitis model induced as in Fig 2A were immunostained with an antibody against STAT3 phosphorylated on Y705. Scale bar, 20  $\mu$ m.

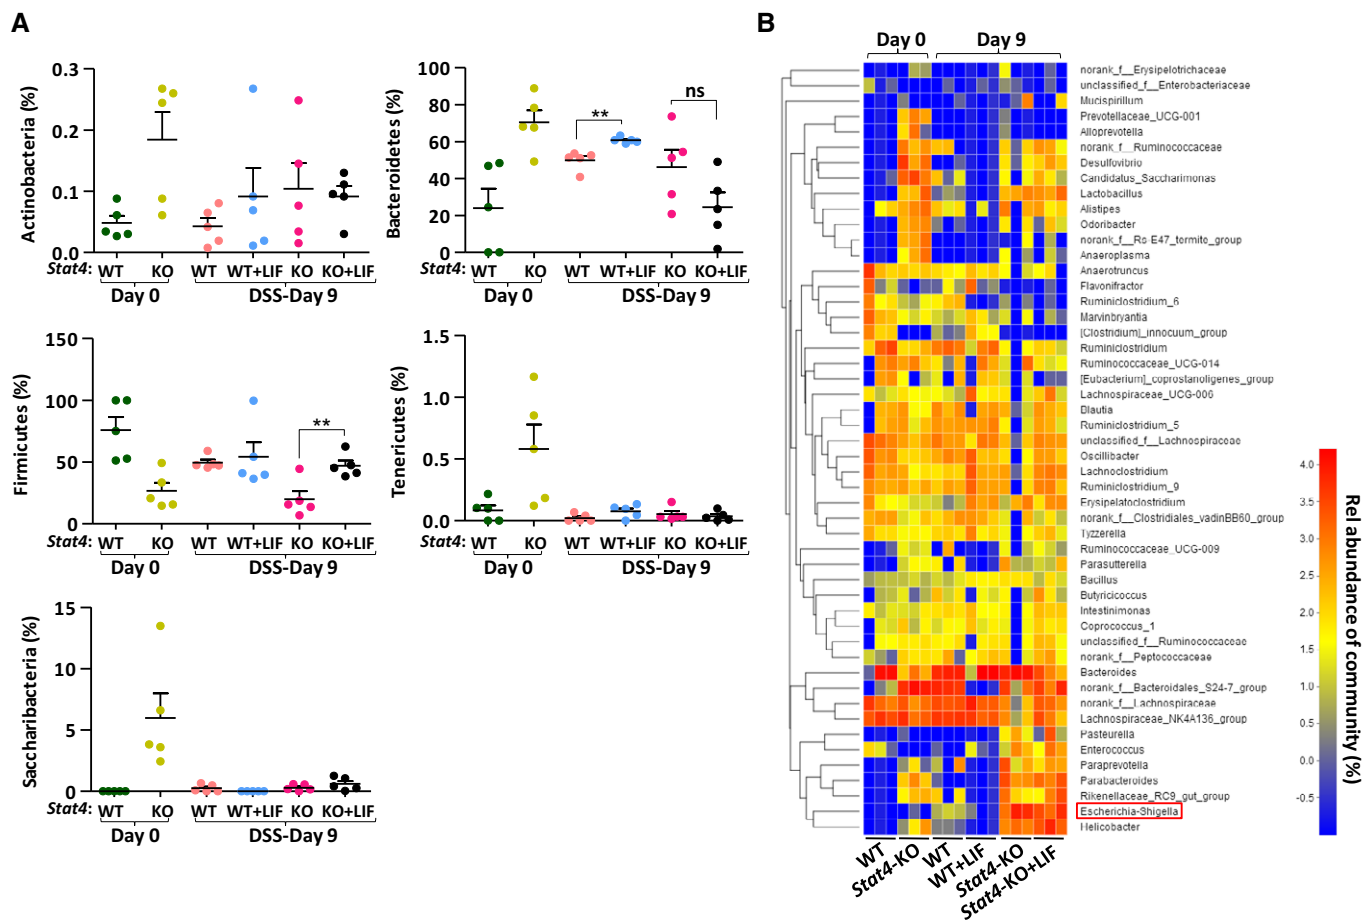

Figure EV5. *Escherichia-Shigella* but not other bacteria are affected by LIF in the amelioration of colitis.

A 16S rRNA sequencing analyses of the microbial distribution at the phylum level in feces from WT and *Stat4*-KO colitis mice treated as described in Fig 2A ( $n = 5$  per group). Error bars represent the SEM.  $**P < 0.01$  (Student's  $t$ -test).

B Heatmap depicting the relative microbial abundance at the genus level in the fecal specimens described in (A) ( $n = 3$  per group).
