# Supplementary material
Source: PubMed Central journal article supplement (PMC6418461)
Supplement: EMBJ-38-e99595-s002.pdf [file EMBJ-38-e99595-s002.pdf]

|               |                        |
|---------------|------------------------|
| <b>p1-s</b>   | AAGCTGAAGAGCTGGGACCT   |
| <b>p1-as</b>  | GGAGATGAGGGATGAGAAGG   |
| <b>p2-s</b>   | CAGCAAGCACAAAAGAAACC   |
| <b>p2-as</b>  | AGATTTAGACATGGAGCTGG   |
| <b>p3-s</b>   | CAGGTCAAGAGAAACAGAC    |
| <b>p3-as</b>  | GCTATCTTCAGACACACCAG   |
| <b>p4-s</b>   | GTCAGAGTTACCAGCCAGCA   |
| <b>p4-as</b>  | GTCTGACATGCAGCATGAGG   |
| <b>p5-s</b>   | CCACAATGAACAGGTGAGAC   |
| <b>p5-as</b>  | ATAGTGAGACCTGGTGTGCT   |
| <b>p6-s</b>   | CCTCATGTCTCTCGCTACTC   |
| <b>p6-as</b>  | TGGCTAGAGAGCATCCCTTG   |
| <b>p7-s</b>   | ATTTAGGGCACAGGTGACATGA |
| <b>p7-as</b>  | CCACTTCCCCGACCTCACTA   |
| <b>p8-s</b>   | CCACCTGGTGAATGACTCAC   |
| <b>p8-as</b>  | GCACCTCAGTCCCTTGTTCT   |
| <b>p9-s</b>   | GGATAATGTGGACTTGGTGG   |
| <b>p9-as</b>  | GTCACCTTAGTCCCTAGCAC   |
| <b>p10-s</b>  | CCAGGATTCTCATGCTGGGT   |
| <b>p10-as</b> | TACTGAGGGATGCTGGGAGA   |

Table EV1. Sequences of the IL17a-IL17f locus-spanning primers used in the ChIP assay.
