# Supplementary material
Source: PubMed Central journal article supplement (PMC6418461)
Supplement: EMBJ-38-e99595-s003.pdf [file EMBJ-38-e99595-s003.pdf]

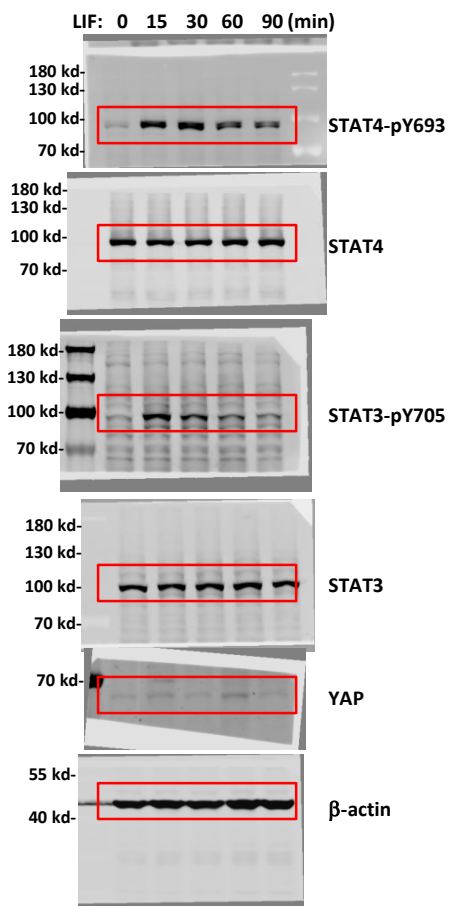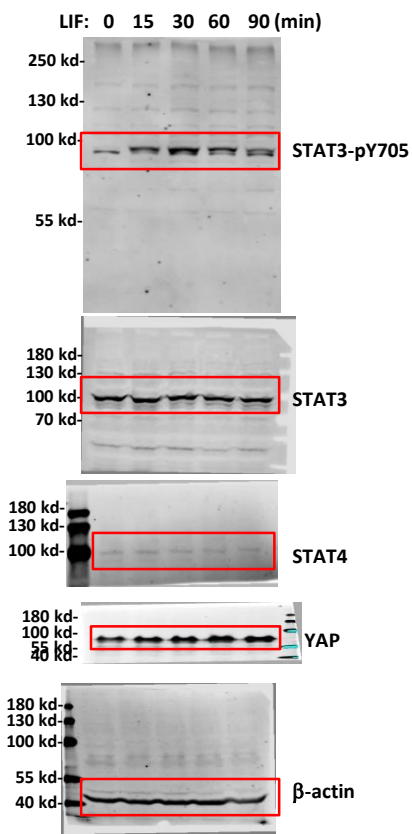

Figure 1. Bacterial dysregulation promotes the secretion of LIF by IECs, which differentially affects immune cells and epithelial.
