# Supplementary material
Source: PubMed Central journal article supplement (PMC6418461)
Supplement: EMBJ-38-e99595-s004.pdf [file EMBJ-38-e99595-s004.pdf]

**B**

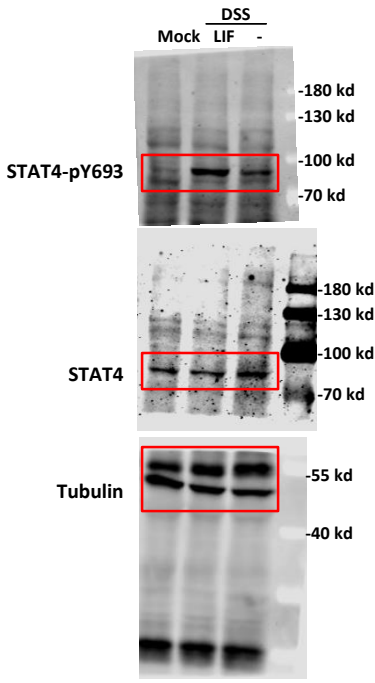

Figure 3. LIF activates STAT4 to block Th17 cell differentiation in the mouse colitis model and *in vitro*.
