# Supplementary material
Source: PubMed Central journal article supplement (PMC6418461)
Supplement: EMBJ-38-e99595-s005.pdf [file EMBJ-38-e99595-s005.pdf]

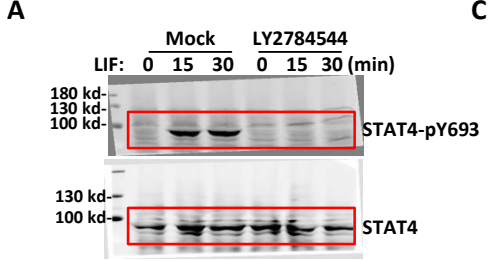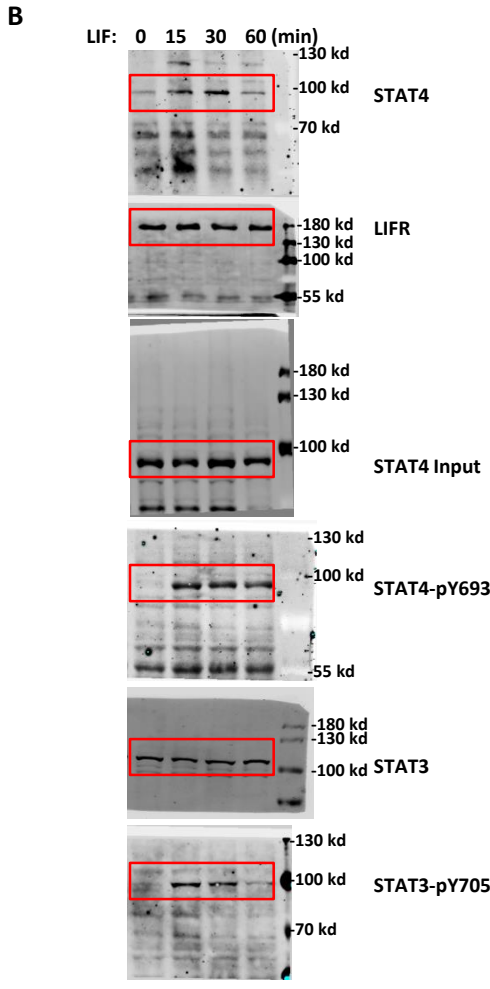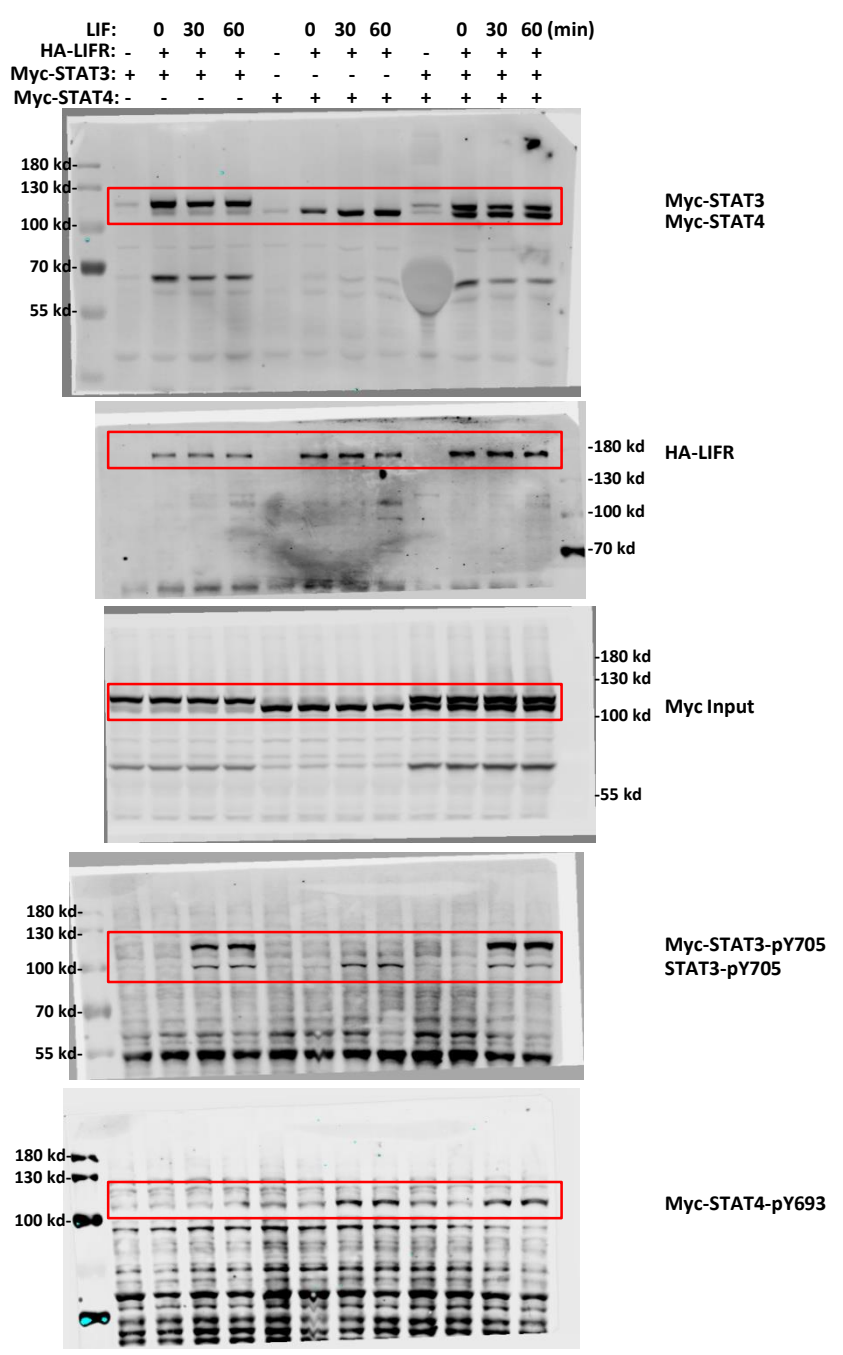

Figure 4. LIF-activated STAT4 is phosphorylated on SPXX motifs within the C-terminal transcription regulation domain.

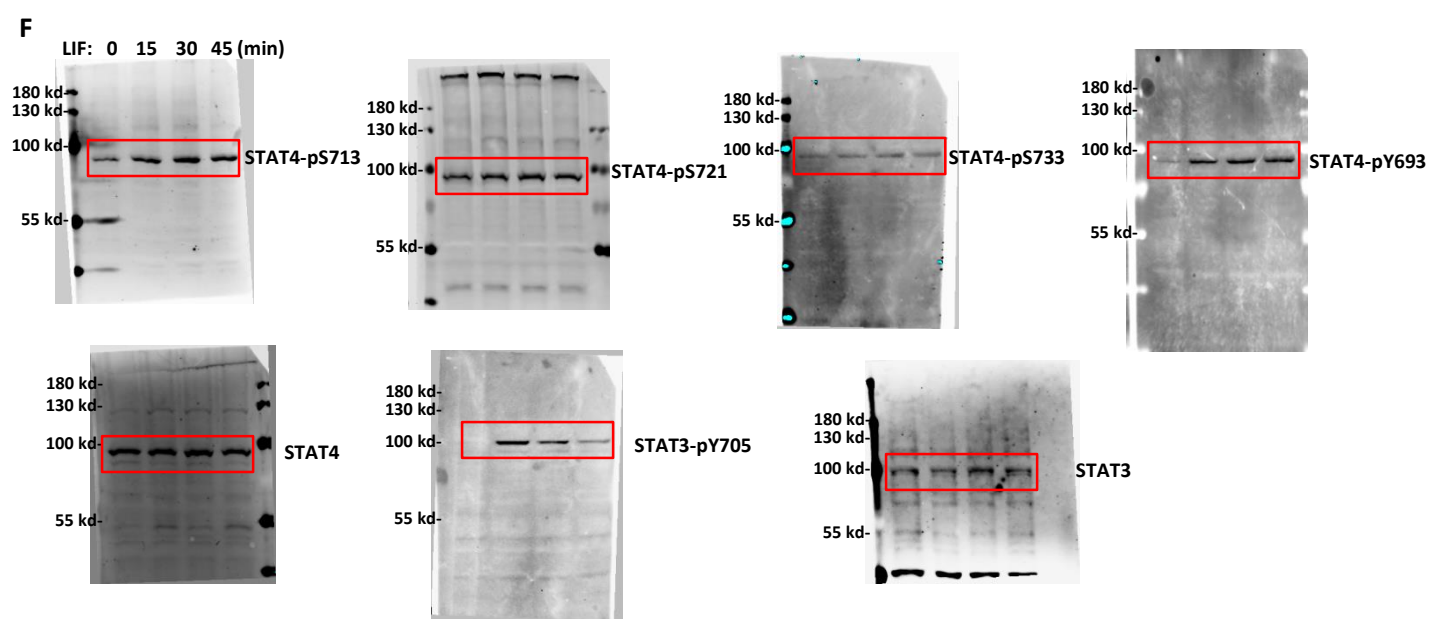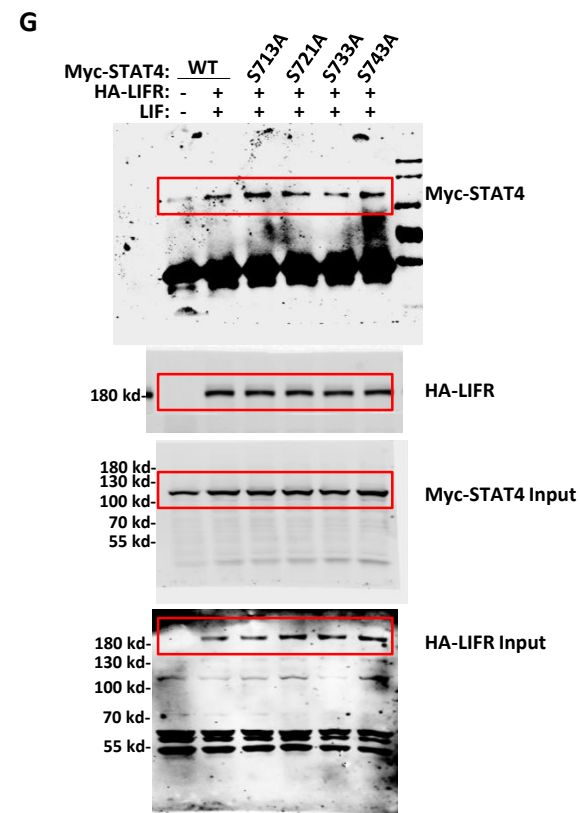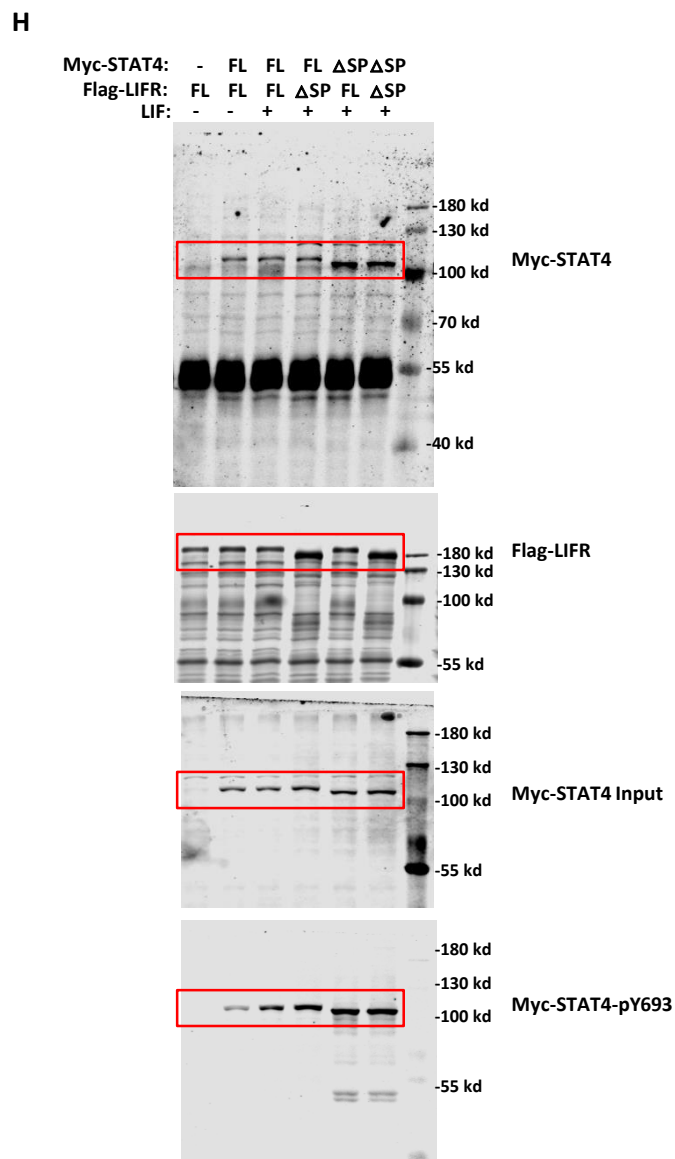

Figure 4. LIF-activated STAT4 is phosphorylated on SPXX motifs within the C-terminal transcription regulation domain.

**Myc-STAT4:** + - + +  
**Flag-STAT3:** - + + +  
**LIF:** - - + -

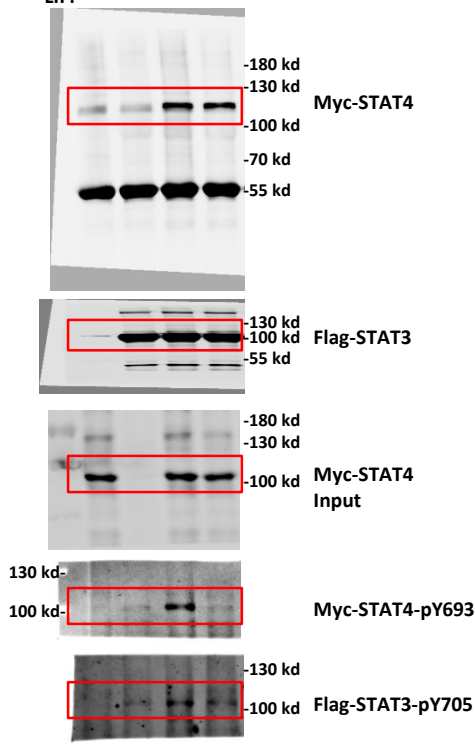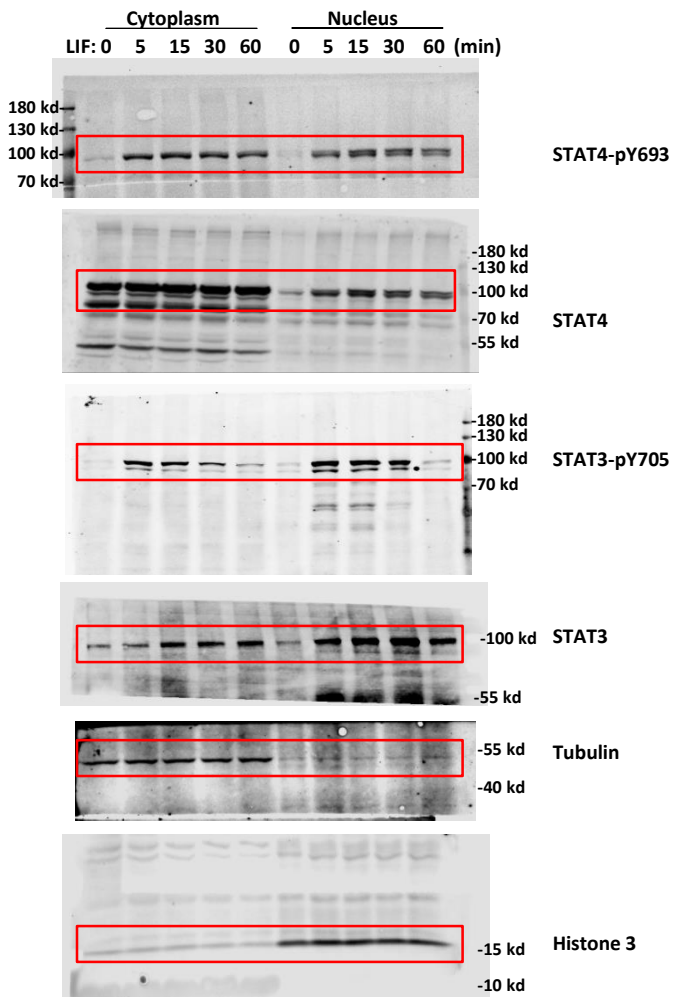

Figure 4. LIF-activated STAT4 is phosphorylated on SPXX motifs within the C-terminal transcription regulation domain.
