# Supplementary material
Source: PubMed Central journal article supplement (PMC6418461)
Supplement: EMBJ-38-e99595-s006.pdf [file EMBJ-38-e99595-s006.pdf]

**F**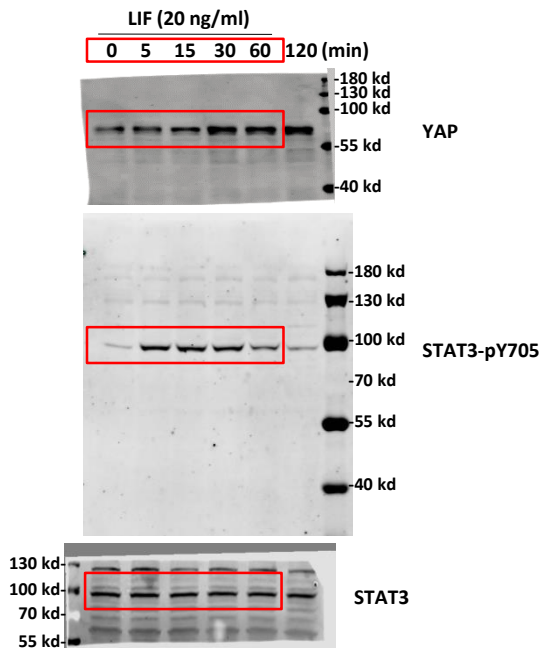**G**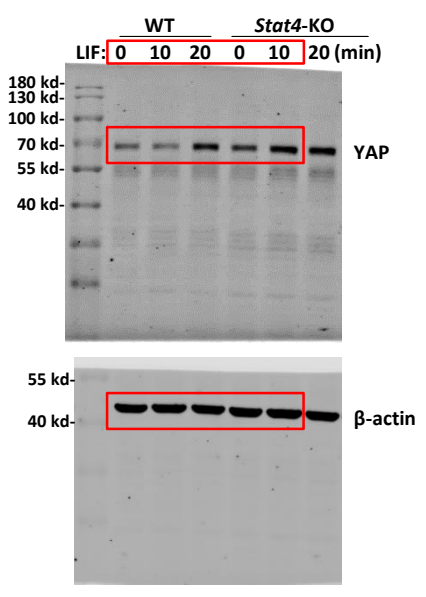

Figure 6. STAT3 is responsible for YAP gene expression and cell proliferation in the intestinal.
